# Supplementary material for: Toenails as biomarker of exposure to essential trace metals: A review
Source: PubMed Central journal article supplement — Environ Res. Author manuscript; Available in PMC 2021 May 29. (PMC8164381; doi:10.1016/j.envres.2019.108787), 2019-10-07

# Toenails as biomarker of exposure to essential trace metals: a review.

Enrique Gutiérrez-González, Esther García-Esquinas, Inmaculada Salcedo-Bellido, Ana Navas-Acien, Virginia Lope, Nerea Fernández de Larrea-Baz, José Luis Gómez-Ariza, Roberto Pastor, Marina Pollán, Beatriz Pérez-Gómez.

## Appendix A

|                                                                                                                                                                            |    |
|----------------------------------------------------------------------------------------------------------------------------------------------------------------------------|----|
| <b>Table A.1:</b> Systematic review on essential trace metals in toenails. Main characteristics of included research studies by research project and publication year..... | 2  |
| <b>Table A.2</b> Correlation among metal/metalloid levels measured in toenails.....                                                                                        | 10 |
| <b>Figure A.1:</b> Systematic review flow-chart .....                                                                                                                      | 11 |
| <b>Figure A.2:</b> Temporal evolution of number of published reports with data on essential trace elements in toenails by metal (1975-2017).....                           | 12 |

**Table A.1: Systematic review on essential trace metals in toenails. Main characteristics of included research studies by research project and publication year**

Note: all the reports of the same research study are presented together. The complete reference of the reports is listed at the end of this table.

| Reference                            | Project                            | Metals            | Study design | N° Participants                                                                                                | IC                                                                                                                                                  | EC | Other biomarkers       | Toenail preparation                                                                                                      | Toenail type                                         | Analit. Method | LD  | LQ | QQ | Main objective                  | Health effect  |                 |
|--------------------------------------|------------------------------------|-------------------|--------------|----------------------------------------------------------------------------------------------------------------|-----------------------------------------------------------------------------------------------------------------------------------------------------|----|------------------------|--------------------------------------------------------------------------------------------------------------------------|------------------------------------------------------|----------------|-----|----|----|---------------------------------|----------------|-----------------|
| van Stekelenburg-1975<br>Netherlands |                                    | Cu                | Ca-Con       | 75                                                                                                             | Patients with cystic fibrosis & healthy control children                                                                                            |    |                        | Cleaned by scrapping debris, washed with acetone & deionized water, dried at 115°                                        | NS                                                   | AAS            |     |    |    | Health effects                  | Other          |                 |
| Masironi-1976<br>Nueva Guinea        |                                    | Cu Mn V           | Cross        | 157                                                                                                            | Families residing along Blackwater-Korosameri & Wogupmeri-Karawari river (high calcium content)                                                     |    |                        | Washed in 3 % analytical grade hydrogen peroxide in absolute alcohol.                                                    | Big toes                                             | NAA            |     |    |    | Health effects                  | CV             |                 |
| McKenzie-1978<br>New Zealand         |                                    | Cu Zn             | Cross        | 48                                                                                                             | Polynesian adults resident in the Tokehau Islands (both sexes), diet with low content of animal protein                                             |    | Hair<br>Serum<br>Urine | Mechanic cleaning, washed in detergent, rinsed in deionized water, EDTA & HNO <sub>3</sub> - HClO <sub>4</sub> digestion | NS                                                   | AAS            |     |    |    | Health effects<br>BM evaluation | CV<br>Metab.   |                 |
| McKenzie-1979<br>New Zealand         |                                    | Zn                | Cross        | 110                                                                                                            | Healthy adults (not oyster eaters); oyster openers (& eaters), galvanizing workers (industrial exposure) & patients of accidents & several diseases |    | Hair<br>Serum<br>Urine | Mechanic cleaning washing in detergent, rinsed in deionized water ,EDTA & HNO <sub>3</sub> - HClO <sub>4</sub> digestion | NS                                                   | AAS            |     |    |    | BM evaluation                   |                |                 |
| Morris-1983<br>USA                   |                                    | Se                | Cross        | 62                                                                                                             | Residents in high (South Dakota), intermediate (Boston, Georgia) & low (New Zealand) Se areas                                                       | Y  | Blood<br>Hair          | Cleaned & rinsed with demineralized water                                                                                | All toes                                             | NAA            |     |    | Y  | BM evaluation                   |                |                 |
| Morita-1986<br>Japan                 |                                    | Fe Cu Zn          | Cross        | 6                                                                                                              | Renal disease patients in treatment with Germanium elixir and healthy persons.                                                                      |    | Hair<br>Fingernail     | Washed, dried                                                                                                            | NS                                                   | ICP-AES        |     |    | Y  | Health effects                  | Other          |                 |
| Kok-1989<br>Netherlands              |                                    | Se                | Ca-Con       | 168                                                                                                            | Acute myocardial infarction cases and age-sex matched healthy controls (<75 yrs)                                                                    |    | Erythrocytes<br>Plasma | Cleaned by scraping off any debris.                                                                                      | All toes                                             | NAA            |     |    | Y  | Health effects<br>BM evaluation | CV<br>Metab.   |                 |
| Hunter -1990a<br>USA                 | NHS I                              | Se                | Cross        | 715                                                                                                            | Age-region matched Se supplement users & non users; cancer free NHS I subsample                                                                     |    |                        | Cleaned by sonication in distilled water & acetone                                                                       | All toes                                             | NAA            |     |    | Y  | BM evaluation                   |                |                 |
| Hunter – 1990b<br>USA                |                                    | Se                | N ca-con     | 868                                                                                                            | Incident breast cancer female cases & age-matched controls in NHSI cohort (30-55 yrs).                                                              |    |                        | Cleaned by sonication in distilled water & acetone                                                                       | All toes                                             | NAA            |     |    |    | Health effects                  | Cancer         |                 |
| Garland -1993<br>USA                 |                                    | Co Cu Fe<br>Se Zn | Coh          | 127                                                                                                            | Sub-sample of Hunter 1990a                                                                                                                          |    |                        | Cleaned by sonication in deionized water                                                                                 | All toes                                             | INAA           |     |    |    | BM evaluation                   |                |                 |
| Garland -1995<br>USA                 |                                    | Se                | N ca-con     | 1960                                                                                                           | Incident cancer female cases & age-matched controls in NHSI cohort (30-55 years).                                                                   |    |                        | Cleaned by sonication in deionized water                                                                                 | All toes                                             | INAA           |     |    |    | Health effects                  | Cancer         |                 |
| Garland -1996<br>USA                 |                                    | Cu Fe Zn          | N ca-con     | 892                                                                                                            | Hunter 1990a breast cancer cases & control participants                                                                                             |    |                        | Cleaned by sonication in deionized water                                                                                 | All toes                                             | INAA           |     |    |    | Health effects                  | Cancer         |                 |
| van't Veer-1990<br>Netherlands       |                                    | Se                | Ca-Con       | 372                                                                                                            | Breast cancer cases & controls ( 25-44 or 55-64 yrs)                                                                                                |    | Erythrocytes<br>Plasma |                                                                                                                          | All toes                                             | INAA           |     |    | Y  | Health effects                  | Cancer         |                 |
| Swanson -1990<br>USA                 | Se                                 | Cross             | 44           | Adults residing in Wyoming & South Dakota (high Se area) & in South Dakota ranches with selenosis in livestock | Y                                                                                                                                                   | Y  | Blood<br>Serum         | Cleaned                                                                                                                  | All toes                                             | NAA            |     |    | Y  | BM evaluation                   |                |                 |
| Longnecker-1991<br>USA               | SOUTH<br>DAKOTA                    | Se                | Cross        | 142                                                                                                            | Swanson -1990 participants + new set of highly exposed residents of these areas                                                                     | Y  | Y                      | Blood<br>Serum<br>Urine                                                                                                  | Cleaned with ultrasound in a bath of distilled water | All toes       | NAA |    |    | Y                               | Health effects | Metab.<br>Other |
| Longnecker-1996<br>USA               |                                    | Se                | Cross        | 77                                                                                                             | Subsample of Longnecker 1991                                                                                                                        |    |                        | Blood<br>Serum<br>Urine                                                                                                  | Cleaned with ultrasound in distilled water           | All toes       | NAA |    |    | Y                               | BM evaluation  |                 |
| Graham-1991<br>USA                   | MACS<br>cohort                     | Cu Zn             | N ca-con     | 162                                                                                                            | Homosexual men (HIV-, HIV+ with & without AIDS)                                                                                                     |    | Serum                  | Cleaned by sonication in distilled water & acetone                                                                       | NS                                                   | TNF            |     |    |    | Health effects                  | Other          |                 |
| Wilhelm-1991<br>Germany              | Duisgurg/<br>Westfalen<br>children | Cu Zn             | Cross        | 461                                                                                                            | Children (3-7 yrs) living in a polluted industrial area (Duisburg) and a rural area (Westfalen)                                                     |    | Hair                   | Mechanic washing in Triton solution, distilled water, acetone /methanol, digested with HNO <sub>3</sub>                  | All toes                                             | AAS            |     |    | Y  | BM evaluation                   |                |                 |
| Wilhelm-1994<br>Germany              |                                    | Cu Zn             | Coh          | 47                                                                                                             | Children of Wilhelm-1991 & their parents two years later.                                                                                           |    | Hair                   | Washed in Triton solution, bidistilled water & acetone/methanol, digested with HNO <sub>3</sub>                          | All toes                                             | AAS            |     |    | Y  | BM evaluation                   |                |                 |

| Reference                        | Project                                    | Metals      | Study design   | N° Participants | IC                                                                                                                                              | EC                                                                                              | Other biomarkers              | Toenail preparation                                                               | Toenail type                                          | Analit. Method | LD   | LQ | QQ | Main objective | Health effect  |
|----------------------------------|--------------------------------------------|-------------|----------------|-----------------|-------------------------------------------------------------------------------------------------------------------------------------------------|-------------------------------------------------------------------------------------------------|-------------------------------|-----------------------------------------------------------------------------------|-------------------------------------------------------|----------------|------|----|----|----------------|----------------|
| Rogers-1991 USA                  |                                            | Se Zn       | Ca-Con         | 893             | Oral cavity cancer cases & age-gender frequency-matched controls 20 -74 years                                                                   |                                                                                                 |                               | Cleaned in an ultrasonic bath using reagent grade deionized water.                | Big toes                                              | INAA           |      |    |    | Health effects | Cancer         |
| Rogers-1993 USA                  |                                            | Fe Zn Co    | Ca-Con         | 893             | Participants of Rogers 1991 & laryngeal & e esophageal cancer cases                                                                             |                                                                                                 |                               | Cleaned in an ultrasonic bath using reagent grade deionized water.                | Big toes                                              | INAA           |      |    |    | Health effects | Cancer         |
| Alfthan-1992 Hungary             |                                            | Se          | Cross          | 132             | Hungarian blood donors (both sexes, 10-61 yrs)                                                                                                  |                                                                                                 | Blood Fingernails             | Cleaned with sodium dodecyl-sulfate, ultrasonicated & rinsed with purified water. | All toes                                              | ADF            |      |    | Y  | BM evaluation  |                |
| Milunsky -1992 USA               |                                            | Zn          | Ca-Con         | 1804            | Women at 15-20 weeks gestation who delivered a baby with neural tube defect & mothers of healthy babies matched by maternal age & delivery year |                                                                                                 |                               | Acetone, cleaned with HNO <sub>3</sub> solution, rinsed with deionized water      | NS                                                    | INAA           |      |    |    | Health effects | Other          |
| Longnecker-1993 USA              |                                            | Se          | Clinical trial | 12              | Non-smoking healthy white males aged 22-64 years, who were given enriched Se bread                                                              |                                                                                                 | Y Blood Serum                 | Cleaned with ultrasound in distilled water                                        | Big toe Other toes                                    | NAA            |      |    |    | BM evaluation  |                |
| van den Brandt-1993a Netherlands | NETHERLANDS COHORT                         | Se          | Ca-coh         | 2829            | Incident lung cancer cases & control sub-cohort (56-69 yrs)                                                                                     |                                                                                                 |                               | Ultrasonic cleaning with acetone, distilled water                                 | All toes                                              | INAA           |      |    | Y  | Health effects | Cancer         |
| van den Brandt-1993b Netherlands |                                            | Se          | Ca-coh         | 2910            | Incident stomach & colorectal cancer cases & control sub-cohort (56-69 yrs)                                                                     |                                                                                                 |                               | Ultrasonic cleaning with acetone, distilled water,                                | All toes                                              | INAA           |      |    | Y  | Health effects | Cancer         |
| van den Brandt-1993c Netherlands |                                            | Se          | Cross          | 2459            | Control sub-cohort of van den Brandt-1993b                                                                                                      |                                                                                                 |                               | Ultrasonic cleaning with acetone, distilled water.                                | All toes                                              | INAA           |      |    | Y  | BM evaluation  |                |
| van den Brandt-1994 Netherlands  |                                            | Se          | Ca-coh         | 1603            | Incident breast cancer cases & female control sub-cohort (56-69 yrs)                                                                            |                                                                                                 |                               | Ultrasonic cleaning with acetone, distilled water                                 | All toes                                              | INAA           |      |    | Y  | Health effects | Cancer         |
| Zeegers-2002 Netherlands         |                                            | Se          | Ca-coh         | 2890            | Incident bladder cancer cases & control sub-cohort of van den Brandt-1993a                                                                      |                                                                                                 |                               | Ultrasonic cleaning with acetone, distilled water                                 | All toes                                              | INAA           |      |    | Y  | Health effects | Cancer         |
| van den Brandt-2003 Netherlands  |                                            | Se          | Ca-coh         | 1751            | Incident prostate cancer cases & male control sub-cohort of van den Brandt-1993a                                                                |                                                                                                 |                               | Ultrasonic cleaning with acetone, distilled water                                 | All toes                                              | INAA           |      |    | Y  | Health effects | Cancer         |
| Geybels-2013 Netherlands         |                                            | Se          | Ca-coh         | 2074            | Advanced prostate cancer cases & male control sub-cohort of van den Brandt-1993a                                                                |                                                                                                 | Y Y                           | Ultrasonic cleaning with acetone, distilled water                                 | All toes                                              | NAA            |      |    | Y  | Health effects | Cancer         |
| Geybels -2014 Netherlands        |                                            | Se          | Ca-coh         | 1865            | Participants of Geybels 2013 with genotyping data                                                                                               |                                                                                                 | Y Y                           | Ultrasonic cleaning with acetone, distilled water                                 | All toes                                              | NAA            |      |    | Y  | Health effects | Cancer         |
| Maasland-2016 Netherlands        |                                            | Se          | Ca-coh         | 2458            | Incident head and neck cancer cases & control sub-cohort of van den Brandt-1993a                                                                |                                                                                                 | Y Y                           | Ultrasonic cleaning with acetone, distilled water                                 | All toes                                              | NAA            |      |    | Y  | Health effects | Cancer         |
| van Noord-1993 Netherlands       |                                            | DOM project | Se             | N ca-con        | 414                                                                                                                                             | Breast cancer cases, age-matched & randomly selected controls from screening cohort (55-70 yrs) |                               |                                                                                   | Ultrasound washing with acetone & demineralized water | Big toes       | INAA |    |    |                | Health effects |
| Ovaskainen-1993 Finland          |                                            | Se          | Cross          | 166             | Helsinki men 55-69 yrs (low selenium area)                                                                                                      |                                                                                                 | Y                             | Washed (neutral detergent), 1% dodecyl sulphate, rinsed (purified water)          | All toes                                              | ADF            |      |    | Y  | BM evaluation  |                |
| Sabbioni -1994 Italy             |                                            | Co          | Cross          | 115             | Subjects occupationally exposed to hard metal dusts, 15-65 yrs                                                                                  |                                                                                                 | Blood Pubic hair Urine        | Washed with purified water, acetone & water again                                 | NS                                                    | NAA            |      |    | Y  | BM evaluation  |                |
| Baskett -1995 USA                | Missouri University Research Reactor study | Se          | Coh            | 4               | Subsample of Baskett 1998 ( 2 men and 2 women)                                                                                                  |                                                                                                 | Fingernails                   | NS                                                                                | All toes                                              | INAA           |      |    | Y  | BM evaluation  |                |
| Baskett- 1998 USA                |                                            | Se          | Cross          | 11              | 11 Missouri University Research coworkers                                                                                                       |                                                                                                 | Fingernails Whole blood Serum | NS                                                                                | All toes                                              | INAA           |      |    |    | BM evaluation  |                |
| Baskett- 2001 USA                |                                            | Se          | Coh            | 11              | Participants of Baskett 1998                                                                                                                    |                                                                                                 | Fingernails                   | NS                                                                                | Big toes Other toes                                   | INAA           |      |    |    | BM evaluation  |                |

| Reference                                   | Project                                         | Metals            | Study design        | N° Participants | IC                                                                                                                                   | EC                                                                                                    | Other biomarkers | Toenail preparation | Toenail type                                                                                                                  | Analit. Method                      | LD           | LQ   | QQ | Main objective | Health effect |
|---------------------------------------------|-------------------------------------------------|-------------------|---------------------|-----------------|--------------------------------------------------------------------------------------------------------------------------------------|-------------------------------------------------------------------------------------------------------|------------------|---------------------|-------------------------------------------------------------------------------------------------------------------------------|-------------------------------------|--------------|------|----|----------------|---------------|
| Vannucchi-1995 Brazil                       |                                                 | Zn                | Cross               | 81              | Alcoholic adults with pellagra & healthy controls 21-54 yrs (both sexes)                                                             |                                                                                                       | Y Y              | Hair Plasma Urine   | Washed by the method of Reilly & Harrison, HNO <sub>3</sub> digestion                                                         | NS                                  | AAS          |      |    | Health effects | Other         |
| van't Veer-1996 5 European countries        | EURAMIC                                         | Se                | Ca-Con              | 721             | Postmenopausal breast cancer cases & age-region matched controls (50-75 yrs)                                                         |                                                                                                       | Y Y              |                     | Unspecified cleaning                                                                                                          | All toes                            | INAA         |      | Y  | Health effects | Cancer        |
| Virtanen -1996 8 Euro Countries+Israel      |                                                 | Se                | Ca-Con              | 1025            | Van't Veer female & Kardinaal 1997 male controls                                                                                     |                                                                                                       |                  |                     |                                                                                                                               | All toes                            | INAA         |      | Y  | BM evaluation  |               |
| Kardinaal-1997 10Euro.Countries+Israel      |                                                 | Se                | Ca-Con              | 1412            | Men with a first acute myocardial infarction & controls < 70 yrs                                                                     |                                                                                                       | Y Y              |                     |                                                                                                                               | All toes                            | INAA         |      | Y  | Health effects | CV            |
| Strain-1997 Northern Ireland                |                                                 | Se                | Ca-Con              | 186             | Irish postmenopausal breast cancer patients and age-matched healthy controls 50-75 yrs                                               |                                                                                                       |                  | Y                   | Cleaned                                                                                                                       | All toes                            | INAA         |      | Y  | Health effects | Cancer Other  |
| Martin-Moreno-2003 8 Euro. Countries+Israel |                                                 | Zn                | Ca-Con              | 1408            | Men with a first acute myocardial infarction & male controls of Kardinaal 1997                                                       |                                                                                                       | Y Y              |                     |                                                                                                                               | All toes                            | INAA         |      | Y  | Health effects | CV Metab.     |
| Rakovic-1997 Czech Republic                 |                                                 |                   | Co Cu Fe Mn Mo V Zn | Cross           | 262                                                                                                                                  | Mixed group (Patients of the faculty hospital, pregnant women, retired persons, students) 13-89 years |                  | Y                   | Scalp hair Pubic hair                                                                                                         | Washed in acetone & deionized water | NS           | INAA |    | Y              | BM evaluation |
| Yoshizawa-1998 USA                          | HPFS                                            | Se                | N ca-con            | 181             | Incident prostate cancer cases & age-smoking status matched controls (40 -75 yrs)                                                    |                                                                                                       | Y                |                     | Cleaned by sonication in deionized water                                                                                      | All toes                            | INAA         |      |    | Health effects | Cancer        |
| Rajpathak-2005 USA                          |                                                 | Se                | N ca-con            | 1247            | Men with prevalent diabetes, men with prevalent diabetes & cardiovascular disease & age-smoking status matched controls (40 -75 yrs) |                                                                                                       | Y                |                     | Cleaned by sonication in deionized water                                                                                      | All toes                            | INAA         |      |    | Health effects | CV            |
| Ghadirian -2000 Canada                      | Canadian case-control study                     | Se                | Ca-Con              | 1736            | Incident breast (35-79 yr) , prostate (35-84 yr) & colon cancer patients + age-sex matched controls                                  |                                                                                                       |                  |                     |                                                                                                                               | Both feet                           | NAA          |      |    | Health effects | Cancer        |
| St-Pierre-2006 Canada                       |                                                 | Se                | Cross               | 87              | Subsample of Ghadirian 2000                                                                                                          |                                                                                                       |                  |                     | None or washed with Triton X-100 diluted 1/200 in Milli-Q deionized water, rinsed Milli-Q deionized water, acetone. Air-dried | Both feet                           | NAA          |      |    | BM evaluation  |               |
| Helzlsouer-2000 USA                         | CLUE II                                         | Se                | N ca-con            | 350             | Incident prostate cancer cases & age-race & recruitment date matched male controls >45 yrs                                           |                                                                                                       | Y                |                     | Digested with HNO <sub>3</sub> by using a microwave digestion system                                                          | Big toes                            | NAA          |      |    | Health effects | Cancer        |
| Platz-2002 USA                              |                                                 | Zn                | N ca-con            | 342             | Incident prostate cancer cases, & controls of Helzlsouer-2000                                                                        |                                                                                                       | Y                |                     | Digested with HNO <sub>3</sub> by using a microwave digestion system                                                          | Big toes                            | AAS          |      |    | Health effects | Cancer        |
| Mannisto -2000 Finland                      | Kuopio Breast Cancer Study                      | Se                | Ca-Con              | 722             | Incident breast cancer cases & age-rurality matched controls                                                                         |                                                                                                       | Y Y              |                     | Cleaned with 1% sodium dodecylsulphate for, then rinsed with demineralized water                                              | All toes                            | ADF          |      | Y  | Health effects | Cancer        |
| Aguiar- 2001 Brasil                         |                                                 | Co Cu Fe Mn Se n  | Cross               | 32              | Cystic fibrosis and healthy children (1-12)                                                                                          |                                                                                                       |                  | Fingernails         | Scintillation flask with non-ionic detergent Triton X100 solution & mechanical shaking. Washed distilled water & acetone      | NS                                  | INAA         |      |    | Health effects | Other         |
| Morris 2001 Canada                          | Canadian Study of Diet Lifestyle & Health       | Se                | Cross               | 755             | Alumni from the Universities of Alberta, Toronto, and Western Ontario and Canadian Cancer Society members.                           |                                                                                                       |                  |                     | Nail polish removed with acetone, sonicated in high-purity water, strained while rinsing with water & freeze-dried            | NS                                  | INAA         |      | Y  | BM evaluation  |               |
| Bergomi -2002 Italy                         |                                                 | Co Cu Fe Mn Se Zn | Ca-Con              | 62              | Incident amyotrophic lateral sclerosis cases & age-sex matched controls                                                              |                                                                                                       | Y Y              |                     | Washed with Triton solution in a sonicator & then with deionized water                                                        | NS                                  | ICP-OES INAA |      | Y  | Health effects | Other         |
| Hartman-2002 Finland                        | α-Tocopherol β-Carotene Cancer Prevention Study | Se                | N ca-con            | 500             | Lung cancer cases & age, date & intervention group assignment matched controls                                                       |                                                                                                       |                  |                     | Cleaned with 1% sodium dodecylsulphate for, then rinsed with demineralized water                                              | All toes                            | ADF          |      | Y  | Health effects | Cancer        |
| Michaud -2002 Finland                       |                                                 | Se                | N ca-con            | 90              | Male bladder cancer cases & age-treatment- date of recruitment matched controls in SouthWest Finland                                 |                                                                                                       |                  |                     | Cleaned with 1% sodium dodecylsulphate for, then rinsed with demineralized water                                              | All toes                            | ADF          |      | Y  | Health effects | Cancer        |

| Reference                  | Project                     | Metals              | Study design | N° Participants | IC                                                                                                           | EC | Other biomarkers | Toenail preparation                                                                                                               | Toenail type                                                | Analit. Method | LD   | LQ | QQ | Main objective                  | Health effect   |
|----------------------------|-----------------------------|---------------------|--------------|-----------------|--------------------------------------------------------------------------------------------------------------|----|------------------|-----------------------------------------------------------------------------------------------------------------------------------|-------------------------------------------------------------|----------------|------|----|----|---------------------------------|-----------------|
| Krogh-2003 Italy           | ORDET                       | Se                  | Coh          | 80              | Sub-sample of a cohort of Italian women to evaluate diet, hormones and breast cancer (pre & post-menopausal) |    |                  | Acetone if nail polish. Sonicated in Triton X100 solution, deionized water, digestion with HNO <sub>3</sub> in a microwave system | All toes                                                    | AAS            | Y    |    | Y  | BM evaluation                   |                 |
| Vinceti-2015 Italy         |                             | Se                  | N ca-con     | 621             | Incident female diabetes cases (type2) & age-matched control women (35-70) in ORDET cohort                   |    |                  | Washed in high purity water, acetone, Triton using an ultrasonic bath                                                             | All toes                                                    | INAA           |      |    | Y  | Health effects                  | Metab.          |
| Rayman-2003 United Kingdom |                             | Se                  | Ca-Con       | 106             | Pregnant women with early symptoms of preeclampsia and age, gestational age and parity matched controls      |    |                  | Placed in acid-washed beaker, washed with acetone and distilled deionized water in a sonic bath, dried.                           | All toes                                                    | INAA           |      |    | Y  | Health effects                  | Other           |
| Menezes -2004a Brazil      | Brazil galvanizing factory  | Co Cu Fe Mn Zn      | Cross        | 48              | Workers in galvanizing factories & non-exposed subjects                                                      |    |                  | Washed and dried                                                                                                                  | NS                                                          | INAA           |      |    | Y  | BM evaluation                   |                 |
| Menezes-2004b Brazil       |                             | Cu Fe               | Cross        | 48              | Participants of Menezes 2004a                                                                                |    |                  | Hair Urine                                                                                                                        | NS                                                          | INAA           |      |    | Y  | BM evaluation                   |                 |
| Lipsky-2004 Austria        |                             | Se                  | Ca-Con       | 150             | Prostate cancer cases & consecutively recruited control urologic patients >45 yrs                            |    |                  | Washing with ultrapure water, microwave assisted digestion with HNO <sub>3</sub> & HClO <sub>4</sub>                              | NS                                                          | ICP-MS         |      |    | Y  | Health effects                  | Cancer          |
| Wongwit-2004 Thailand      |                             | Mn                  | Cross        | 182             | Welders working in a thermal plant in direct contact with Mn                                                 |    |                  | Washed with acetone twice on a mechanical shaker, digested with HNO <sub>3</sub>                                                  | NS                                                          | AAS            |      |    |    | BM evaluation                   |                 |
| Bergomi -2005 Italy        | MELANOMA Case-Control study | Cu                  | Ca-Con       | 116             | Incident melanoma cases & sex-age matched population based controls                                          |    |                  | Washed with Triton solution in a sonicator & then digested in HNO <sub>3</sub> & deionized H <sub>2</sub> O                       | NS                                                          | ICP-OES        |      |    | Y  | Health effects                  | Cancer          |
|                            |                             | Fe Se Zn            |              |                 |                                                                                                              |    |                  |                                                                                                                                   | Washed with Triton solution in a sonicator                  |                | INAA |    |    |                                 | Cancer          |
| Vinceti-2005 Italy         |                             | Cu                  | Ca-Con       | 116             | Participants of Bergomi 2005                                                                                 |    |                  | Washed in Triton solution, deionized water & HNO <sub>3</sub> digestion.                                                          | Both feet                                                   | ICP-OES        |      |    | Y  | Health effects                  | Cancer          |
|                            |                             | Fe Se Zn            |              |                 |                                                                                                              |    |                  |                                                                                                                                   | Cleaned with diethyl-ether, bidistilled water & acetone     |                | INAA |    |    |                                 |                 |
| Vinceti-2012 Italy         |                             | Se                  | Ca-Con       | 105             | Participants of Bergomi 2005                                                                                 |    |                  | Cleaned with diethyl-ether, bi-distilled water & acetone                                                                          | Right foot                                                  | INAA           |      |    | Y  | BM evaluation<br>Health effects | Cancer          |
| Musil -2005 Czech Republic |                             | Se                  | Ca-Con       | 52              | Acute pancreatitis & colorectal cancer cases and age-sex matched controls, 23-78 yrs                         |    |                  | Erythrocytes Plasma                                                                                                               | Big toes                                                    | NAA            |      |    |    | Health effects                  | Cancer<br>Other |
| Slotnick-2005 USA          |                             | Co Cu Mn Mo Se V    | Cross        | 259             | Arab-Americans adults and children residing in a highly industrialized area                                  |    |                  | Washing, rinsed with acetone, digested in HNO <sub>3</sub>                                                                        | All toes                                                    | ICP-MS         |      |    | Y  | BM evaluation                   |                 |
| Rainska-2005 Poland        |                             | Co Cu Mn Mo V Zn    | Cross        | 26              | Workers in a phosphatic fertilizer plant & controls                                                          |    |                  | Washed in acetone–water–water–water–acetone                                                                                       | NS                                                          | INAA           |      |    | Y  | BM evaluation                   |                 |
| Al-Saleh-2006 Arabia Saudi |                             | Se                  | Cross        | 691             | Subjects participating in a cross-sectional study about Se & vitamin status                                  |    |                  | Cleaned with detergent, rinsed with deionised water, digested with HNO <sub>3</sub> , HCl                                         | Big toes                                                    | AAS            | Y    |    | Y  | BM evaluation                   |                 |
| Le Marchand-2006 USA       |                             | Se                  | Ca-Con       | 278             | Caucasian melanoma cases 18-79 yrs & race-sex-age matched population based controls                          |    |                  | Y Y Blood                                                                                                                         | NS                                                          | INAA           |      |    |    | BM evaluation<br>Health effects | Cancer          |
| Morris-2006 USA            |                             | Se                  | Cross        | 3575            | Volunteers living in 111 of Missouri's 114 counties                                                          |    |                  | Y Fingernails                                                                                                                     | Freezed                                                     | NS             | INAA |    |    | BM evaluation                   |                 |
| Satia-2006 USA             | VITAL study                 | Se                  | Coh          | 220             | Sub-sample of members of a cohort to research dietary supplement use and cancer risk                         |    |                  | Y Plasma                                                                                                                          | Cleaned with ultrasound in a bath of distilled water        | All toes       | INAA |    |    | Y                               | BM evaluation   |
| González-2008 USA          |                             | Zn                  | Cross        | 212             | Participants of Satia 2006                                                                                   |    |                  |                                                                                                                                   |                                                             | All toes       | INAA |    |    |                                 | BM evaluation   |
| Rainska-2007 Poland        |                             | Co Cu Mn Fe Se V Zn | Cross        | 33              | Subjects living near a fertilizer plant & controls                                                           |    |                  | Hair                                                                                                                              | Washed in acetone–water–water–water–acetone+ultrasound bath | NS             | INAA |    |    | Y                               | BM evaluation   |

| Reference               | Project                                 | Metals                    | Study design | N° Participants | IC                                                                                                                                             | EC | Other biomarkers | Toenail preparation                                                                                                            | Toenail type | Analit. Method | LD | LQ | QQ | Main objective                  | Health effect   |
|-------------------------|-----------------------------------------|---------------------------|--------------|-----------------|------------------------------------------------------------------------------------------------------------------------------------------------|----|------------------|--------------------------------------------------------------------------------------------------------------------------------|--------------|----------------|----|----|----|---------------------------------|-----------------|
| Guthrie-2007, 2008 USA  | One source cohort study                 | Mn Se                     | Coh          | 126             | Consumers of Multivitamin-mineral supplement (containing Se/Mn/Cu/Zn) & sex- age-bmi-smoking status matched controls (both sexes, volunteers)  |    |                  | Sonicated in HNO <sub>3</sub> solution, decanted & sonicated in water, rinsed with milliQ-water                                | NS           | INAA           | Y  |    | Y  | BM evaluation                   |                 |
| Brockman-2009 USA       |                                         | Cu Se Zn                  | Coh          | 126             | Participants of Guthrie 2007                                                                                                                   |    |                  | Sonicated in HNO <sub>3</sub> solution, decanted & sonicated in water, rinsed with milliQ-water                                | NS           | INAA           | Y  |    | Y  | BM evaluation                   |                 |
| Campos -2008 Colombia   |                                         | Zn                        | Ca-Con       | 443             | Incident gastric cancer patients & hospital controls                                                                                           |    |                  | Cleaned with neutral detergent & rinsed with deionized water, digested in HNO <sub>3</sub>                                     | NS           | ICP-MS         |    |    | Y  | Health effects                  | Cancer          |
| Nouri-2008 Iran         |                                         | Mo Zn                     | Ca-Con       | 100             | Esophageal cancer patients, family members & matched controls of 2 areas with different risk                                                   |    |                  | Cleaned with acetone, alcohol, & distilled water. HNO <sub>3</sub> digestion                                                   | NS           | AAS            |    |    | Y  | BM evaluation<br>Health effects | Cancer          |
| Goullé -2009 France     |                                         | Co Cu Mn<br>Mo Se V<br>Zn | Cross        | 50              | Healthy volunteers (both sexes)                                                                                                                |    |                  | Fingernails<br>Washed with water, acetone decontamination, HNO <sub>3</sub> digestion                                          | NS           | ICP-MS         | Y  |    |    | BM evaluation                   |                 |
| Were-2009 Kenya         |                                         | Fe Zn                     | Cross        | 33              | Children <6 yrs in urban & rural areas in Kenya                                                                                                |    |                  | Fingernails<br>Soaked in non-ionic liquid soap, acetone & rinsed in deionised distilled water. Digestion with HNO <sub>3</sub> | NS           | AAS            | Y  |    | Y  | BM evaluation                   |                 |
| Żukowska-2009 Poland    |                                         | Se                        | Cross        | 336             | Randomly selected inhabitants of Pomeranian District and from Lubuskie District.                                                               |    |                  | Scratched with a quartz knife. Cleaned by acetone and deionized water plus ultrasonic bath & drying                            | All toes     | INAA           |    |    | Y  | BM evaluation                   |                 |
| Kotsopoulos-2010 Canada |                                         | Se                        | Ca-Con       | 50              | Female BRCA1 healthy mutation carriers and sex-matched non-carriers family members                                                             |    |                  | Washed in Triton solution, rinsed with deionized water & acetone, drying.                                                      | NS           | NAA            |    |    |    | Health effects                  | Other           |
| Xun -2010a USA          | CARDIA trace element study cohort       | Se                        | Coh          | 4032            | American young adults (18–30 yrs) of 4 USA regions recruited for a cohort study on psychological and lifestyle CV risk factors in young adults |    |                  | Washed with 10% HNO <sub>3</sub> & deionized water, then rinsed                                                                | All toes     | INAA           |    |    | Y  | Health effects                  | CV              |
| Xun -2010b USA          |                                         | Se                        | Coh          | 3112            | Participants of Xun 2010a                                                                                                                      |    |                  | Washed with 10% HNO <sub>3</sub> & deionized water, then rinsed                                                                | All toes     | INAA           |    |    | Y  | Health effects                  | Other           |
| Xun -2011 USA           |                                         | Se                        | Coh          | 4252            | Participants of Xun 2010a                                                                                                                      |    |                  | Washed in a sonicator with HNO <sub>3</sub> & deionized water, then rinsed                                                     | All toes     | INAA           |    |    |    | BM evaluation                   |                 |
| Colangelo-2014 USA      |                                         | Se                        | Coh          | 3735            | Participants of Xun 2010a                                                                                                                      |    |                  | Washing in a sonicator with deionized water                                                                                    | All toes     | INAA           |    |    |    | Health effects                  | Other           |
| Park -2016a USA         |                                         | Se Zn                     | Coh          | 3960            | Participants of Xun 2010a free of diabetes at baseline                                                                                         |    |                  | Washing in a sonicator with HNO <sub>3</sub> & deionized water, then rinsed                                                    | All toes     | ICP-MS         |    |    |    | Health effects                  | Metab.          |
| O'Doherty-2010 Ireland  | FINBAR                                  | Fe                        | Ca-Con       | 534             | Esophageal adenocarcinoma cases, Barrett's esophagus patients & age-matched randomly selected controls                                         |    |                  | Washed with deionized water & 10% HNO <sub>3</sub> using a sonicator                                                           | Big toes     | INAA           |    |    | Y  | Health effects                  | Cancer<br>Other |
| O'Rorke-2012 Ireland    |                                         | Co Se Zn                  | Ca-Con       | 595             | Participants of O'Doherty 2010 & reflux esophagitis patients                                                                                   |    |                  | Washed with deionised water & 10% HNO <sub>3</sub> using a sonicator                                                           | Big toes     | INAA           |    |    | Y  | Health effects                  | Cancer<br>Other |
| Laohaudomchok-2011 USA  |                                         | Mn                        | Cross        | 49              | Active & retired members of a boilermaker union & welder apprentices in Quincy with retrospectively constructed job-history (USA)              |    |                  | Washed in Triton X-100, rinsed repeatedly in Milli-Q water, digested in HNO <sub>3</sub>                                       | All toes     | ICP-MS         |    |    |    | BM evaluation                   |                 |
| Grashow-2014 USA        | Harvard Boilermakers Longitudinal Study | Mn                        | Coh          | 48              | Participants of Laohaudomchok-2011                                                                                                             |    |                  | Sonicated in 1% Triton X-100, rinsed in Milli-Q water, dried, digested in HNO <sub>3</sub>                                     | All toes     | ICP-MS         | Y  |    | Y  | BM evaluation                   |                 |
| Wong-2014 USA           |                                         | Mn                        | Coh          | 87              | Boilermakers, male, unionized apprentices or journeymen, > 18 yrs                                                                              |    |                  |                                                                                                                                | All toes     | ICP-MS         |    |    | Y  | Health effects                  | Other           |
| Wong-2015 USA           |                                         | Mn                        | Coh          | 25              | Boilermakers, male, unionized apprentices or journeymen, >18 yrs                                                                               |    |                  |                                                                                                                                | All toes     | ICP-MS         |    |    | Y  | Health effects                  | CV              |

| Reference                | Project                                | Metals                 | Study design | N° Participants | IC                                                                                                                                               | EC | Other biomarkers | Toenail preparation          | Toenail type                                                                                                                                             | Analit. Method | LD             | LQ | QQ | Main objective                | Health effect |  |
|--------------------------|----------------------------------------|------------------------|--------------|-----------------|--------------------------------------------------------------------------------------------------------------------------------------------------|----|------------------|------------------------------|----------------------------------------------------------------------------------------------------------------------------------------------------------|----------------|----------------|----|----|-------------------------------|---------------|--|
| Mozaffarian-2011 USA     | NHS I + HPFS                           | Se                     | N ca-con     | 6854            | Incident CV disease or stroke cases & age-race-smoking cohort matched control (dentist excluded)                                                 | Y  | Y                |                              | Cleaned by sonication in deionized water                                                                                                                 | All toes       | NAA            |    |    | Health effect                 | CV            |  |
| Park-2011 USA            |                                        | Se                     | Cross        | 3902            | Mozaffarian 2011 controls                                                                                                                        |    |                  |                              | Cleaned by sonication in deionized water                                                                                                                 | All toes       | NAA            |    |    | BM evaluation                 |               |  |
| Mozaffarian-2012 USA     |                                        | Se                     | Coh          | 6045            | Mozafarian 2011 participants (hypertension at toenail sampling excluded) + new set of controls                                                   | Y  | Y                |                              | Cleaned by sonication in deionized water                                                                                                                 | All toes       | NAA            |    |    | Health effects                | CV            |  |
| Park-2012 USA            |                                        | Se                     | Coh          | 7165            | Mozafarian 2011& 2012 participants (diabetes at toenail sampling excluded)                                                                       |    | Y                |                              | Cleaned by sonication in deionized water                                                                                                                 | All toes       | NAA            |    |    | Health effects                | Metab.        |  |
| Mozaffarian-2013 USA     |                                        | Se                     | Coh          | 9267            | Mozafarian 2011 & 2012 participants (diabetes at toenail sampling excluded)                                                                      | Y  | Y                |                              | Cleaned by sonication in deionized water                                                                                                                 | All toes       | NAA            |    |    | Health effects                | Metab.        |  |
| Abdulrahman-2012 Nigeria |                                        | Cu Fe Mn Zn            | Cross        | NS              | Assorted volunteers, including workers in an iron welder workshop, alcohol and non-alcohol drinkers                                              |    |                  | Hair Fingernails             | Cleaned with Triton X-100, soaking in acetone & rinsed with deionized water, digestion with a mixture of HNO <sub>3</sub> & HCl                          | NS             | AAS            |    | Y  | BM evaluation                 |               |  |
| Al-Sabbak-2012 Iraq      |                                        | Co Cu Fe Mn Mo Se V Zn | Ca-Con       | 56              | Parents of children with birth defects or of normal babies born in Al Basrah after 2003 invasion and bombing                                     | Y  |                  | Hair Teeth                   | Washed, sonicated in acetone, rinsed several times in deionized water & acetone dried & then reconstituted in HNO <sub>3</sub>                           | NS             | ICP-MS         |    |    | BM evaluation                 |               |  |
| Amaral-2012 Spain        | PANKRAS EPICURO                        | Cu Fe Mn Se V Zn       | Ca-Con       | 517             | Pancreatic cancer cases & hospital-matched controls                                                                                              | Y  | Y                |                              | HNO <sub>3</sub> digestion, H <sub>2</sub> O <sub>2</sub> & deionized water                                                                              | NS             | ICP-MS         |    | Y  | Health effects                | Cancer        |  |
| Coelho -2012 Portugal    | Panasqueira Mine                       | Mn Se                  | Cross        | 102             | Adult residents in the vicinity of Panasqueira tungsten-tin mine, male mine workers & age-sex-lifestyle and smoking matched non-exposed controls | Y  | Y                | Blood Fingernails Hair Urine | Mechanical cleaning, sonication with acetone, rinse with deionized water and oven-dried. Acid digestion with HNO <sub>3</sub>                            | NS             | ICP-MS         |    | Y  | BM evaluation Health effects  |               |  |
| Coelho -2014 Portugal    |                                        | Cu Fe Mn Mo Se Zn      | Cross        | 122             | Participants of Coelho -2012 & small number of new recruits in the three groups                                                                  | Y  | Y                | Blood Fingernails Hair Urine | Acid digestion with closed vessel, microwave assisted, HNO <sub>3</sub> addition.                                                                        | NS             | ICP-MS ICP-OES |    | Y  | BM evaluation                 |               |  |
| Emmanuelle -2012 France  |                                        | Se                     | Coh          | 78              | Residents in area with high levels of Se in drinking water & non-exposed subjects matched by age, sex and social status                          | Y  | Y                |                              | Sonicated in a detergent & ultrapure water. Dried & digested with graphite heating block system, adding HNO <sub>3</sub> & H <sub>2</sub> O <sub>2</sub> | NS             | ICP-MS         | Y  | Y  | Y                             | BM evaluation |  |
| Mordukhovich-2012 USA    | NORMATIVE AGING                        | Mn                     | Cross        | 639             | Male army veterans without any chronic condition at recruitment in 1963 providing toenail sample between 1999-2009                               | Y  | Y                |                              | Sonicated in Triton-x solution, rinsed with distilled deionized water                                                                                    | All toes       | ICP-MS         | Y  | Y  | Health effects                | CV            |  |
| Przybylowicz-2012 Poland |                                        | Co Cu Fe Zn            | Cross        | 42              | Healthy volunteers (both sexes)                                                                                                                  |    |                  | Hair Fingernails             | Washed in water, Triton X-100, methanol in ultrasonic bath. HNO <sub>3</sub> digestion                                                                   | NS             | ICP-MS         | Y  | Y  | Y                             | BM evaluation |  |
| Anic 2013 USA            |                                        | Fe                     | Ca-Con       | 600             | Incident multiform glioblastoma or anaplastic astrocytoma cases & friends and other non-blood related controls                                   | Y  | Y                |                              | Immersed in 10% (v/v) HNO <sub>3</sub> , sonicated, decanted, immersed in 18MΩ-cm water, sonicated & rinsed with 18MΩ-cm water                           | Big toes       | INAA           |    | Y  | Health effects                | Cancer        |  |
| Herman-2013 Poland       |                                        | Cu                     | Cross        | 30              | Healthy volunteers of both sexes from the urban areas of Krakow.                                                                                 |    |                  | Hair Fingernails             | Washed in distilled water, Triton X-100, CH <sub>3</sub> OH in ultrasonic bath, dried. HNO <sub>3</sub> digestion                                        | NS             | AAS            | Y  | Y  | Y                             | BM evaluation |  |
| Morris-2013 USA          | Selenium Supplement Intoxication Study | Se                     | Coh          | 45              | USA Subjects that answered call looking for users of certain multivitamin supplements with known misformulated Se levels                         | Y  | Y                | Fingernails                  | NS                                                                                                                                                       | All toes       | NAA            |    |    | BM evaluation/ Health effects | Other         |  |
| Saat-2013 Bangladesh     |                                        | Co                     | Cross        | 80              | Bangladesh vegetable male farmers randomly selected from a list of registered farmers employed >1 year (18-80 yrs)                               |    |                  | Hair Fingernails             | Soaked in Triton 100 & acetone, rinsed with deionized water & acetone, dried & digested in HNO <sub>3</sub> & H <sub>2</sub> O <sub>2</sub>              | NS             | ICP-MS         |    |    | BM evaluation Health effects  | CV            |  |

| Reference                  | Project               | Metals            | Study design   | N° Participants | IC | EC | Other biomarkers | Toenail preparation                                                                                                                                                                     | Toenail type | Analit. Method | LD | LQ | QQ | Main objective               | Health effect    |
|----------------------------|-----------------------|-------------------|----------------|-----------------|----|----|------------------|-----------------------------------------------------------------------------------------------------------------------------------------------------------------------------------------|--------------|----------------|----|----|----|------------------------------|------------------|
| Burgess-2014 USA           |                       | Se                | Cross          | 55              |    |    | Urine            | Washed with acetone, Triton X-100 & water, HNO <sub>3</sub> digestion                                                                                                                   | NS           | ICP-MS         | Y  |    | Y  | Health effects               | Other            |
| Kristal-2014 USA           | SELECT                | Se                | Ca-coh         | 4761            | Y  | Y  |                  | NS                                                                                                                                                                                      | All toes     | INAA           |    |    | Y  | Health effects               | Cancer           |
| Kuiper-2014 Qatar          |                       | Cu Mn Mo Se       | Cross          | 239             | Y  | Y  | Urine            | Cleaning with sonication & rinsed with acetone, HNO <sub>3</sub> digestion                                                                                                              | All toes     | ICP-MS         | Y  |    | Y  | BM evaluation                |                  |
| Ndilila-2014 Zambia        |                       | Co Cu Se Zn       | Cross          | 86              | Y  | Y  |                  | Autoclaved, ultrasonicated with acetone & Milli-Q water, rinsed, dried, digested in HNO <sub>3</sub> & H <sub>2</sub> O <sub>2</sub>                                                    | All toes     | ICP-MS         |    |    | Y  | BM evaluation                |                  |
| Sanders-2014 Vietnam       |                       | Mn                | Cross          | 20              | Y  | Y  | Blood            | Washed with double distilled water, acetone, dried, digestion with HNO <sub>3</sub> & HCl                                                                                               | NS           | ICP-MS         |    |    |    | BM Evaluation                |                  |
| Chanpiwat-2015 Cambodia    |                       | Co Cu Fe Mn Mo Zn | Cross          | 180             | Y  | Y  | Hair Urine       | Immersed in Triton X-100, sonicated, washed with milli-Q water, dried, digested with HNO <sub>3</sub>                                                                                   | All toes     | ICP-MS         | Y  |    | Y  | BM evaluation                |                  |
| Mohmand-2015 Pakistan      |                       | Co Cu Mn Zn       | Cross          | 30              |    | Y  | Hair Serum       | HNO <sub>3</sub> digestion                                                                                                                                                              | NS           | ICP-MS         |    |    | Y  | BM evaluation                |                  |
| Rayman-2015 United Kingdom | SPRINT                | Se                | Clinical trial | 230             | Y  | Y  | Blood            | Washed with acetone, distilled deionized water in a sonic bath.                                                                                                                         | All toes     | INAA           |    |    | Y  | BM evaluation Health effects | Other            |
| Mao-2016 United Kingdom    |                       | Se                | Clinical trial | 227             | Y  | Y  | Blood            | Washed with acetone, distilled deionized water in a sonic bath.                                                                                                                         | All toes     | INAA           |    |    | Y  | Health effects               | Other            |
| Reis-2015 Portugal         |                       | Cu Mn             | Cross          | 30              | Y  | Y  |                  | Washed rinsed in Milli-Q water & methanol, dried, digestion with HNO <sub>3</sub> & H <sub>2</sub> O <sub>2</sub>                                                                       | All toes     | ICP-MS         |    |    | Y  | BM evaluation                |                  |
| Rodrigues-2015 Bangladesh  |                       | Mn                | Coh            | 711             | Y  | Y  | Cord blood Hair  | Placed in glass beakers with Triton X-100 solution in ultrasonic bath, rinsed in deionized water, oven-dried, digested with ultrahigh purity HNO <sub>3</sub> & diluted deionized water | All toes     | ICP-MS         | Y  |    | Y  | BM evaluation                |                  |
| Hashemian-2016 Iran        | GOLESTAN Cohort Study | Fe Se Zn          | Cross          | 30              |    |    |                  | Acetone, HNO <sub>3</sub> in a sonicator, then rinsed, water & sonicated                                                                                                                | All toes     | INAA           |    |    | Y  | BM evaluation                |                  |
| Hashemian-2017 Iran        |                       | Se Zn             | N ca-con       | 443             | Y  | Y  |                  |                                                                                                                                                                                         | All toes     | INAA           |    |    | Y  | Health effects               | Cancer           |
| Hassani-2016 Iran          |                       | Mn                | Cross          | 83              | Y  | Y  | Blood Urine      | Sonication in Tritone X-100 solution, washed with deionized water & dried. HNO <sub>3</sub> , H <sub>2</sub> O <sub>2</sub> , HCl digestion                                             | All toes     | AAS            | Y  | Y  |    | BM evaluation Health effects | Other            |
| Lee -2016 Korea            |                       | Fe Se Zn          | Cross          | 73              | Y  | Y  |                  | Washed with acetone, then demineralized water in a sonicator, rinsed and freeze-dried                                                                                                   | NS           | INAA           |    |    | Y  | BM evaluation Health effects | CV. Metab. Other |
| McKinney-2016 Thailand     |                       | Zn                | Ca-Con         | 190             | Y  |    |                  |                                                                                                                                                                                         | NS           | INAA           |    |    |    | Health effects               | Other            |



| Reference             | Project                | Metals         | Study design | N° Participants | IC                                                                                                                    | EC | Other biomarkers | Toenail preparation                             | Toenail type                                                                                                                     | Analit. Method | LD     | LQ | QQ | Main objective | Health effect |
|-----------------------|------------------------|----------------|--------------|-----------------|-----------------------------------------------------------------------------------------------------------------------|----|------------------|-------------------------------------------------|----------------------------------------------------------------------------------------------------------------------------------|----------------|--------|----|----|----------------|---------------|
| Park-2016b Korea      | SELEN study            | Se             | Cross        | 501             | Participants of a cohort study of middle-aged adults living in urban & rural south-eastern areas of South Korea       |    | Y Y              | Inspected to eliminate contaminated and cleaned | All toes                                                                                                                         | INAA           |        |    | Y  | Health effects | Metab.        |
| Park-2017 Korea       |                        | Se             | Coh          | 501             | Participants of Park 2016b                                                                                            |    | Y Y              | Washed in a sonicator with deionized water      | All toes                                                                                                                         | INAA           |        |    | Y  | Health effects | Metab.        |
| Jang-2017 Korea       |                        | Se             | Coh          | 501             | Participants of Park 2016b                                                                                            |    | Y Y              | Washed in a sonicator with deionized water      | All toes                                                                                                                         | INAA           |        |    | Y  | Health effects | Metab.        |
| Punshon 2016 USA      | NHBC                   | Mn Se Zn       | Cross        | 687             | Recent mothers (2 weeks post-partum)+ 8 weeks newborns residing & drinking well water in New Hampshire (↑As in water) |    | Y Y              | Placenta                                        | Manual removal of visible dirt, ultrasonic bath using Triton X-100, acetone, deionized water, and dry.                           | NS             | ICP-MS | Y  |    | BM evaluation  |               |
| Bouchard -2017 Canada | New Brunswick Children | Mn             | Cross        | 259             | Children (6–13 yrs) consuming well water with high levels of Mg in southeastern New Brunswick.                        |    | Y Y              | Hair Saliva                                     | Sonicated in Triton X-100, rinsed with Milli-Q water, digested in HNO <sub>3</sub> -HCl                                          | All toes       | ICP-MS | Y  | Y  | Health effects | Other         |
| Ntihakose-2017 Canada |                        | Mn             | Cross        | 274             | Participants of Bouchard 2017                                                                                         |    | Y Y              | Hair Saliva                                     | Sonicated in Triton X-100, rinsed with Milli-Q water, digested in HNO <sub>3</sub> -HCl                                          | All toes       | ICP-MS | Y  | Y  | BM evaluation  |               |
| Everson-2017 USA      | RHODE ISLAND           | Se             | Coh          | 173             | Healthy mothers >18 yrs with singleton, viable, non-pathologic pregnancies born at ≥37 weeks gestation                |    | Y Y              |                                                 | Washed in a Triton X-100 & acetone, deionized water, digested with HNO <sub>3</sub>                                              | All toes       | ICP-MS |    | Y  | Health effects | Other         |
| Meramat-2017 Malaysia | NEURO PROTECTIVE       | Co Cu Fe Se Zn | Cross        | 235             | Malaysian subjects > 60 yrs participants in study on healthy longevity                                                |    | Y Y              |                                                 | Washing in Triton-X, deionized water, acetone & rinsing in deionized water & dried in oven. Digestion in HNO <sub>3</sub> & H2O2 | All toes       | ICP-MS |    | Y  | Health effects | Other         |
| Sureda-2017 Spain     |                        | Co Fe Se Zn    | Cross        | 100             | Active and inactive adults 55-80 yrs with no previous cardiovascular disease                                          |    | Y Y              |                                                 | Cleaned with acetone, distilled deionized water & acetone again                                                                  | NS             | INAA   |    | Y  | BM evaluation  |               |
| Ward-2017 USA         |                        | Mn             | Cross        | 80              | Male welders occupationally exposed to Mn (21-61) & sex- age-matched factory controls(18-61)                          |    | Y Y              |                                                 | Sonicated in 1% Triton X-100, rinsed in deionized water, digested in HNO <sub>3</sub>                                            | All toes       | ICP-MS |    | Y  | BM evaluation  |               |

Cross: Cross-sectional; Ca-Con: case-control; N ca-con: nested case-control; Coh: cohort; Ca-Coh: Case-cohort; CS: convenience sample; V: volunteers; NS: non specified; N°:number; Y: yes; IC: informed consent; EC: ethics committee; LD: limit of detection; LQ: limit of quantification; QQ: quality control; NHSI: Nurse Health Study (Women); HPFS: Health professional Follow up Study (Men); NHBC: New Hampshire Cohort; ICP-MS: Inductively Coupled Plasma Mass Spectrometry ; ICP-AES: Inductively Coupled Plasma Atomic Emission Spectroscopy ; ICP-OES: Inductively Coupled Plasma Optical Emission Spectroscopy ; INAA: Instrumental Neutron Activation Analysis ; NAA: Neutron Activation Analysis ; ADF: Acid Digestion Fluorimetry; AAS: Atomic Absorption Spectroscopy; TNF: Thermal Neutron Flux; BM: Biomarker; CV: Cardiovascular effects. Metab: Metabolic effects.



Figure A.1: Systematic review flow-chart

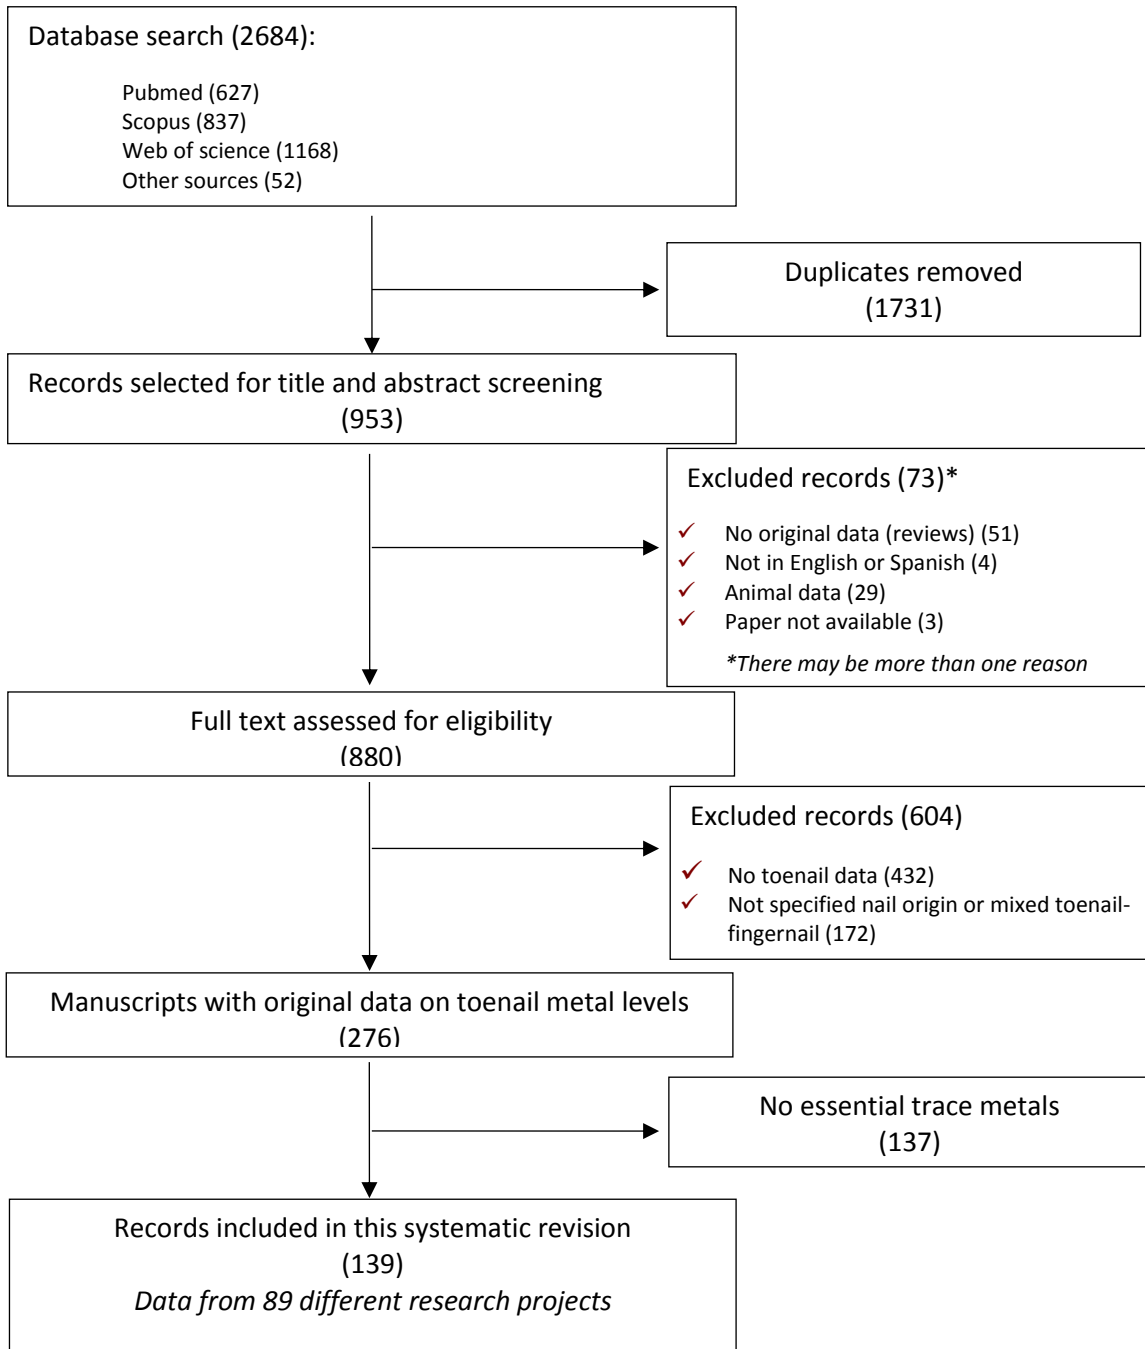

Figure A.2: Temporal evolution of number of published reports with data on essential trace elements in toenails by metal (1975-2017).

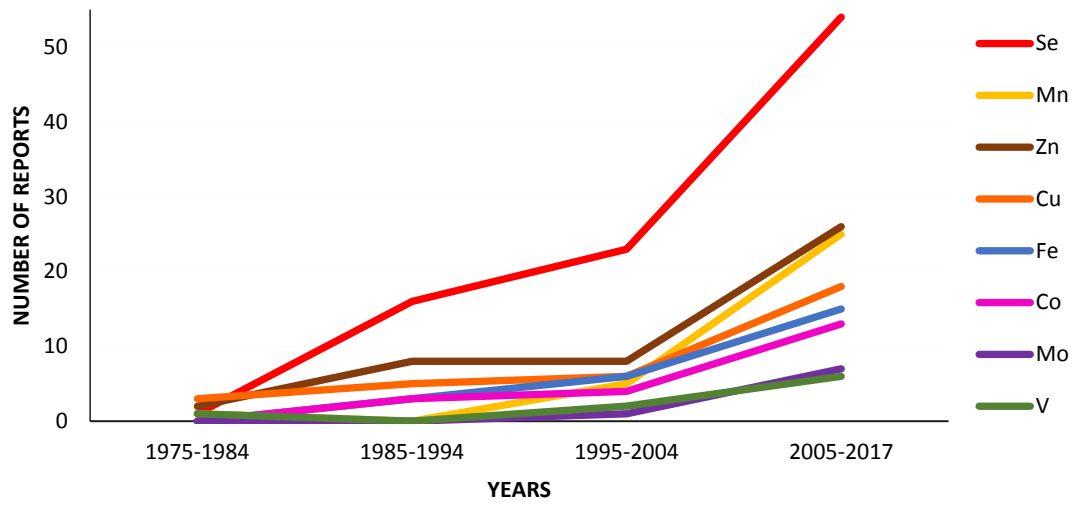

Supplement: NIHMS1694901-supplement-Appendix_A.pdf [file NIHMS1694901-supplement-Appendix_A.pdf]
